# Supplementary material for: Monogenean anchor morphometry: systematic value, phylogenetic signal, and evolution
Source: PeerJ. 2016 Feb 4;4:e1668. doi: 10.7717/peerj.1668 (PMC4783769; doi:10.7717/peerj.1668)
Supplement: Table S2 — Metadata for the specimens used in the present study. [file peerj-04-1668-s028.xlsx]

## Sheet: Sheet1
Slide	Deposition number			Remarks	Abbreviations
bant_386c4	MZUM(P)	2012	243(P)		MZUM: Museum of Zoology, University of Malaya, Kuala Lumpur, Malaysia
bant_387d1	MZUM(P)	2012	232(P)		NHMUK: Natural History Museum, London, UK
bant_387e1	MZUM(P)	2012	233(P)		ZRC.PAR.: Zoological Reference Collection, Lee Kong Chian Natural History Museum, National University of Singapore, Singapore
bant_443a2	MZUM(P)	2012	245(P)		(P) after MZUM : Parasitological collection
bant_443f1	MZUM(P)	2012	246(P)		(P) : Paratype specimen
bant_443f5	MZUM(P)	2012	247(P)		(V) : Voucher specimen
bant_443j8	MZUM(P)	2012	250(P)
bant_445f2	MZUM(P)	2012	252(P)
bant_445f4	MZUM(P)	2012	253(P)
bant_446a2	MZUM(P)	2012	235(P)
bant_446b1	MZUM(P)	2012	236(P)
bant_446b5	MZUM(P)	2012	237(P)
bant_447b6	MZUM(P)	2012	257(P)
bant_447c1	MZUM(P)	2012	258(P)
bant_447e2	MZUM(P)	2012	259(P)
bant_447e6	MZUM(P)	2012	260(P)
bant_467b1	MZUM(P)	2012	254(P)
bant_50b2	MZUM(P)	2012	222(P)
bant_50b9	MZUM(P)	2012	223(P)
bant_50c1	MZUM(P)	2012	224(P)
bant_50c2	MZUM(P)	2012	225(P)
bant_50c4	MZUM(P)	2012	226(P)
bant_50c7	MZUM(P)	2012	227(P)
bant_50d6	MZUM(P)	2012	228(P)
bant_50h1	MZUM(P)	2012	229(P)
bant_50m5	MZUM(P)	2012	231(P)
bant_512a4	MZUM(P)	2013	255(V)
bant_512b6	MZUM(P)	2013	256(V)
bant_512d4	MZUM(P)	2013	257(V)
bant_512f3	MZUM(P)	2013	258(V)
bant_541e2	MZUM(P)	2013	259(V)
bel_130a4	MZUM(P)	2013	401(P)
bel_130a7	MZUM(P)	2013	402(P)
bel_130a8	MZUM(P)	2013	403(P)
bel_130f3	MZUM(P)	2013	405(P)
bel_130f6	MZUM(P)	2013	406(P)
bel_131a2	MZUM(P)	2013	409(P)
bel_131b2	MZUM(P)	2013	411(P)
bel_131b5	MZUM(P)	2013	412(P)
bel_131f3	MZUM(P)	2013	420(P)
bel_131g2	MZUM(P)	2013	421(P)
bel_211a2	MZUM(P)	2013	329(P)
bel_211a3	MZUM(P)	2013	330(P)
bel_211b1	MZUM(P)	2013	332(P)
bel_211b3	MZUM(P)	2013	333(P)
bel_211d2	MZUM(P)	2013	334(P)
bel_211d3	MZUM(P)	2013	335(P)
bel_211d4	MZUM(P)	2013	336(P)
bel_211d5	MZUM(P)	2013	337(P)
bel_211e2	MZUM(P)	2013	339(P)
bel_386a1	MZUM(P)	2013	345(P)
bel_386c7	MZUM(P)	2013	347(P)
bel_386d3	MZUM(P)	2013	348(P)
bel_386e2	MZUM(P)	2013	350(P)
bel_386f6	MZUM(P)	2013	351(P)
bel_387a3	MZUM(P)	2013	341(P)
bel_387a6	MZUM(P)	2013	342(P)
bel_387d4	MZUM(P)	2013	343(P)
bel_439a1	MZUM(P)	2013	356(P)
bel_474a5	MZUM(P)	2013	392(P)
bel_474b4	MZUM(P)	2013	393(P)
bel_512b7	MZUM(P)	2013	305(P)
bel_512c4	MZUM(P)	2013	206(P)
bel_512c5	MZUM(P)	2013	207(P)
bel_512f6	MZUM(P)	2013	208(P)
bel_541a1	MZUM(P)	2013	468(P)
bel_541b1	MZUM(P)	2013	309(P)
bel_541b2	MZUM(P)	2013	310(P)
bel_541b3	MZUM(P)	2013	311(P)
bel_541b4	MZUM(P)	2013	312(P)
bel_541b5	MZUM(P)	2013	313(P)
bel_541c1	NHMUK 2013.8.16.1
bel_541d1	MZUM(P)	2013	470(P)
bel_541e3	MZUM(P)	2013	318(P)
bel_541f2	MZUM(P)	2013	320(P)
bel_542a2	MZUM(P)	2013	321(P)
bel_542a3	MZUM(P)	2013	322(P)
bel_542d5	MZUM(P)	2013	325(P)
bel_542f5	MZUM(P)	2013	327(P)
carey_216d1	MZUM(P)	2012	949(P)
carey_386c2	MZUM(P)	2012	945(P)
carey_386f4	MZUM(P)	2012	946(P)
carey_443b5	MZUM(P)	2012	950(P)
carey_445a1	MZUM(P)	2012	951(P)
carey_445h5	MZUM(P)	2012	952(P)
carey_446a5	MZUM(P)	2012	947(P)
carey_446d6	MZUM(P)	2012	948(P)
carey_475c1	MZUM(P)	2012	953(P)
carey_540a3	MZUM(P)	2013	304(V)
gran_1403a4	MZUM(P)	2014	114(P)
gran_1403b1	MZUM(P)	2014	115(P)
gran_1403c1	MZUM(P)	2014	116(P)
gran_1403c2	MZUM(P)	2014	117(P)
gran_1403c3	MZUM(P)	2014	118(P)
gran_1403d1	MZUM(P)	2014	120(P)
gran_1403d2	MZUM(P)	2014	121(P)
gran_1403d3	MZUM(P)	2014	122(P)
gran_1403d4	MZUM(P)	2014	123(P)
gran_1403e2	NHMUK 2014.11.10.11
gran_1403f1	ZRC.PAR.		45
gran_1403g1	MZUM(P)	2014	124(P)
gran_1403g2	MZUM(P)	2014	125(P)
gran_1403g3	MZUM(P)	2014	126(P)
gran_1403g4	MZUM(P)	2014	127(P)
gran_1403g5	MZUM(P)	2014	128(P)
gran_58h6	MZUM(P)	2014	108(P)
gran_58m1	MZUM(P)	2014	109(P)
gran_58m2	MZUM(P)	2014	110(P)
gran_58n1	MZUM(P)	2014	111(P)
gran_58n2	MZUM(P)	2014	112(P)
gran_58n3	MZUM(P)	2014	113(P)
chel_130a3	MZUM(P)	2012	377(P)
chel_130d1	MZUM(P)	2012	379(P)
chel_211e3	MZUM(P)	2012	278(P)
chel_216a2	MZUM(P)	2012	313(P)
chel_216b1	MZUM(P)	2012	314(P)
chel_386c6	MZUM(P)	2012	295(P)
chel_386c8	MZUM(P)	2012	296(P)
chel_386d6	MZUM(P)	2012	298(P)
chel_386e7	MZUM(P)	2012	300(P)
chel_386f1	MZUM(P)	2012	301(P)
chel_386f2	MZUM(P)	2012	302(P)
chel_386f3	MZUM(P)	2012	303(P)
chel_387a4	MZUM(P)	2012	290(P)
chel_387a7	MZUM(P)	2012	291(P)
chel_387a9	MZUM(P)	2012	292(P)
chel_439c2	MZUM(P)	2012	317(P)
chel_446b4	MZUM(P)	2012	304(P)
chel_446d3	MZUM(P)	2012	305(P)
chel_446e1	MZUM(P)	2012	238(P)
chel_446e3	MZUM(P)	2012	306(P)
chel_446e4	MZUM(P)	2012	239(P)
chel_474a1	MZUM(P)	2012	883(P)
chel_474a3	MZUM(P)	2012	369(P)
chel_474a4	MZUM(P)	2012	370(P)
chel_474c1	MZUM(P)	2012	371(P)
chel_50b4	MZUM(P)	2012	279(P)
chel_50c3	MZUM(P)	2012	280(P)
chel_50c5	MZUM(P)	2012	281(P)
chel_50d2	MZUM(P)	2012	282(P)
chel_50d3	MZUM(P)	2012	283(P)
chel_50d5	MZUM(P)	2012	284(P)
chel_50h3	MZUM(P)	2012	285(P)
chel_50i6	MZUM(P)	2012	287(P)
chel_50i7	MZUM(P)	2012	286(P)
chel_50m6	MZUM(P)	2012	289(P)
chel_512a3	MZUM(P)	2013	260(V)
chel_512c6	MZUM(P)	2013	262(V)
chel_512d2	MZUM(P)	2013	263(V)
chel_512d5	MZUM(P)	2013	264(V)
chel_512d6	MZUM(P)	2013	265(V)
chel_512e1	MZUM(P)	2013	266(V)
chel_512e5	MZUM(P)	2013	267(V)
chel_512f4	MZUM(P)	2013	268(V)
chel_540a1	MZUM(P)	2013	269(V)
chel_540a2	MZUM(P)	2013	270(V)
chel_541a2	MZUM(P)	2013	469(V)
chel_541d2	MZUM(P)	2013	472(V)
chel_541d4	MZUM(P)	2013	473(V)
chel_541d5	MZUM(P)	2013	474(V)
funn_130a1	MZUM(P)	2012	886(P)
funn_130b2	MZUM(P)	2012	888(P)
funn_130c6	MZUM(P)	2012	890(P)
funn_130d2	MZUM(P)	2012	892(P)
funn_130e6	MZUM(P)	2012	893(P)
funn_130f2	MZUM(P)	2012	894(P)
funn_130f4	MZUM(P)	2012	895(P)
funn_131a6	MZUM(P)	2012	911(P)
funn_216a4	MZUM(P)	2012	852(P)
funn_216d2	MZUM(P)	2012	854(P)
funn_216d3	MZUM(P)	2012	855(P)
funn_217b3	MZUM(P)	2012	858(P)
funn_386a2	MZUM(P)	2012	839(P)
funn_386a8	MZUM(P)	2012	840(P)
funn_387a1	MZUM(P)	2012	468(P)
funn_443a2	MZUM(P)	2012	860(P)
funn_443a5	MZUM(P)	2012	861(P)
funn_443b3	MZUM(P)	2012	862(P)
funn_443b9	MZUM(P)	2012	863(P)
funn_443c1	MZUM(P)	2012	864(P)
funn_443e4	MZUM(P)	2012	865(P)
funn_443e6	MZUM(P)	2012	866(P)
funn_443f3	MZUM(P)	2012	867(P)
funn_443h2	MZUM(P)	2012	868(P)
funn_443i1	MZUM(P)	2012	869(P)
funn_443j7	MZUM(P)	2012	871(P)
funn_445b5	MZUM(P)	2012	872(P)
funn_445h3	MZUM(P)	2012	874(P)
funn_446c4	MZUM(P)	2012	842(P)
funn_446d1	MZUM(P)	2012	845(P)
funn_447f3	MZUM(P)	2012	882(P)
funn_459d1	MZUM(P)	2012	881(P)
funn_470b5	MZUM(P)	2012	876(P)
funn_474c3	MZUM(P)	2012	884(P)
funn_50d1	MZUM(P)	2012	828(P)
funn_50i2	MZUM(P)	2012	830(P)
funn_50i6	MZUM(P)	2012	831(P)
funn_50m1	MZUM(P)	2012	834(P)
funn_50m2	MZUM(P)	2012	835(P)
funn_50m3	MZUM(P)	2012	836(P)
funn_512a6	MZUM(P)	2013	291(V)
funn_512a8	MZUM(P)	2013	292(V)
funn_512b1	MZUM(P)	2013	293(V)
funn_512c1	MZUM(P)	2013	294(V)
funn_512c7	MZUM(P)	2013	295(V)
funn_512e7	MZUM(P)	2013	296(V)
funn_512f1	MZUM(P)	2013	297(V)
funn_542a1	MZUM(P)	2013	299(V)
funn_542f3	MZUM(P)	2013	302(V)
fen_480b1	MZUM(P)	2012	1061(P)
fen_480b3	MZUM(P)	2012	1062(P)
fen_480e1	MZUM(P)	2012	1064(P)
fen_481a1	MZUM(P)	2012	1066(P)
fen_481b2	MZUM(P)	2012	1067(P)
fen_481c3	MZUM(P)	2012	1068(P)
fen_481g3	MZUM(P)	2012	1070(P)
fen_481g6	MZUM(P)	2012	1071(P)
fen_505c4	MZUM(P)	2012	1074(P)
fen_505c5	MZUM(P)	2012	1075(P)
fen_517b1	MZUM(P)	2013	202(V)
fen_517b4	MZUM(P)	2013	203(V)
fen_517c7	MZUM(P)	2013	204(V)
fen_517d5	MZUM(P)	2013	207(V)
fen_517f2	MZUM(P)	2013	208(V)
fen_517g3	MZUM(P)	2013	209(V)
fen_517i5	MZUM(P)	2013	211(V)
fen_517i6	MZUM(P)	2013	212(V)
fen_519a4	MZUM(P)	2015	60(V)
fen_519a5	MZUM(P)	2015	61(V)
fen_519b2	MZUM(P)	2015	41(V)
fen_519b3	MZUM(P)	2015	42(V)
fen_519b5	MZUM(P)	2015	44(V)
fen_519b6	MZUM(P)	2015	45(V)
fen_519b8	MZUM(P)	2015	46(V)
fen_519c1	MZUM(P)	2015	49(V)
fen_519c2	MZUM(P)	2015	50(V)
fen_519c3	MZUM(P)	2015	51(V)
fen_519c4	MZUM(P)	2015	52(V)
fen_519c5	MZUM(P)	2015	53(V)
fen_520a2	MZUM(P)	2013	213(V)
fen_520a4	MZUM(P)	2013	214(V)
fen_520a5	MZUM(P)	2013	215(V)
fen_520b2	MZUM(P)	2013	216(V)
fen_520c10	MZUM(P)	2013	219(V)
fen_520c4	MZUM(P)	2013	217(V)
fen_520c6	MZUM(P)	2013	218(V)
fen_520d1	MZUM(P)	2013	220(V)
fen_520d2	MZUM(P)	2013	221(V)
fen_520d7	MZUM(P)	2013	222(V)
fen_520d8	MZUM(P)	2013	223(V)
fen_520d9	MZUM(P)	2013	224(V)
fen_520e11	MZUM(P)	2013	225(V)
fen_532a1	MZUM(P)	2013	228(V)
fen_532a2	MZUM(P)	2013	229(V)
fen_532b3	MZUM(P)	2013	230(V)
fen_532b4	MZUM(P)	2013	231(V)
fen_532b5	MZUM(P)	2013	232(V)
fen_532c1	MZUM(P)	2013	233(V)
joh_58a2	NHMUK 2014.11.10.2
joh_58a5	NHMUK 2014.11.10.1
joh_58b5	NHMUK 2014.11.10.3
joh_58d4	MZUM(P)	2014	40(P)
joh_58e1	ZRC.PAR.		40
joh_58e3	ZRC.PAR.		41
joh_58e5	ZRC.PAR.		42
joh_58f4	MZUM(P)	2014	41(P)
joh_58g2	MZUM(P)	2014	42(P)
joh_58i3	MZUM(P)	2014	46(P)
joh_58i6	MZUM(P)	2014	48(P)
joh_58i7	MZUM(P)	2014	49(P)
joh_58j1	MZUM(P)	2014	50(P)
joh_58j3	MZUM(P)	2014	51(P)
joh_58k1	MZUM(P)	2014	54(P)
joh_58o3	MZUM(P)	2014	62(P)
joh_58o4	MZUM(P)	2014	63(P)
joh_58o5	MZUM(P)	2014	64(P)
joh_58p1	MZUM(P)	2014	65(P)
joh_58p2	MZUM(P)	2014	66(P)
joh_58p3	MZUM(P)	2014	67(P)
joh_58p4	MZUM(P)	2014	68(P)
joh_58q1	MZUM(P)	2014	69(P)
joh_58q10	MZUM(P)	2014	75(P)
joh_58q12	MZUM(P)	2014	76(P)
joh_58q2	MZUM(P)	2014	70(P)
joh_58q3	MZUM(P)	2014	71(P)
joh_58q4	MZUM(P)	2014	72(P)
joh_58q5	MZUM(P)	2014	73(P)
joh_58q7	MZUM(P)	2014	74(P)
joh_58r1	MZUM(P)	2014	77(P)
joh_58r3	MZUM(P)	2014	78(P)
joh_58r4	MZUM(P)	2014	79(P)
joh_58r7	MZUM(P)	2014	81(P)
joh_58s2	MZUM(P)	2014	82(P)
joh_58s3	MZUM(P)	2014	83(P)
joh_58s4	MZUM(P)	2014	84(P)
joh_58s6	MZUM(P)	2014	85(P)
joh_58t3	MZUM(P)	2014	86(P)
joh_58t5	MZUM(P)	2014	88(P)
joh_58t6	MZUM(P)	2014	89(P)
joh_58t8a	MZUM(P)	2014	90(P)
joh_58t8b	MZUM(P)	2014	91(P)
joh_58u2	MZUM(P)	2014	92(P)
joh_58u3	MZUM(P)	2014	93(P)
joh_58u5	MZUM(P)	2014	94(P)
joh_58u6	MZUM(P)	2014	95(P)
joh_58u7	MZUM(P)	2014	96(P)
joh_58u8	MZUM(P)	2014	97(P)
joh_58v7	MZUM(P)	2014	103(P)
kedah_481a2	MZUM(P)	2012	1003(P)
kedah_481a3	MZUM(P)	2012	1004(P)
kedah_481a5	MZUM(P)	2012	1006(P)
kedah_481b1	MZUM(P)	2012	1007(P)
kedah_481b3	MZUM(P)	2012	1008(P)
kedah_481b4	MZUM(P)	2012	1009(P)
kedah_481b5	MZUM(P)	2012	1010(P)
kedah_481b6	MZUM(P)	2012	1011(P)
kedah_481c1	MZUM(P)	2012	1012(P)
kedah_481c2	MZUM(P)	2012	1013(P)
kedah_481c4	MZUM(P)	2012	1014(P)
kedah_481c5	MZUM(P)	2012	1015(P)
kedah_481c6	MZUM(P)	2012	1016(P)
kedah_481f1	MZUM(P)	2012	1026(P)
kedah_481f3	MZUM(P)	2012	1027(P)
kedah_481g1	MZUM(P)	2012	1028(P)
kedah_481g2	MZUM(P)	2012	1029(P)
kedah_481g4	MZUM(P)	2012	1030(P)
kedah_481g5	MZUM(P)	2012	1031(P)
kedah_505b3	MZUM(P)	2012	1037(P)
kedah_505c3	MZUM(P)	2012	1039(P)
kedah_517a11	MZUM(P)	2013	68(V)
kedah_517a5	MZUM(P)	2013	64(V)
kedah_517a6	MZUM(P)	2013	65(V)
kedah_517a7	MZUM(P)	2013	66(V)
kedah_517a8	MZUM(P)	2013	67(V)
kedah_517g1	MZUM(P)	2013	88(V)
kedah_517g4	MZUM(P)	2013	89(V)
kedah_532c3	MZUM(P)	2013	140(V)
kedah_532c6	MZUM(P)	2013	142(V)
kedah_533c1	MZUM(P)	2013	155(V)
kedah_533c2	MZUM(P)	2013	156(V)
kedah_533c3	MZUM(P)	2013	157(V)
kedah_533c5	MZUM(P)	2013	158(V)
kedah_533c6	MZUM(P)	2013	159(V)
kedah_534a1	NHMUK 2013.8.16.10
kedah_534a5	NHMUK 2013.8.16.12
kedah_534b3	MZUM(P)	2013	476(V)
kedah_534b6	MZUM(P)	2013	477(V)
kedah_534b7	MZUM(P)	2013	478(V)
kedah_534c1	MZUM(P)	2013	163(V)
kedah_534c11	MZUM(P)	2013	165(V)
kedah_534c5	MZUM(P)	2013	164(V)
kedah_534d12	MZUM(P)	2013	176(V)
kedah_534d2	MZUM(P)	2013	168(V)
kedah_534d3	MZUM(P)	2013	169(V)
kedah_534d4	MZUM(P)	2013	170(V)
kedah_534d6	MZUM(P)	2013	171(V)
kedah_534d7	MZUM(P)	2013	172(V)
kedah_534d8	MZUM(P)	2013	173(V)
kederai_480b2	MZUM(P)	2012	288(P)
kederai_480e2	MZUM(P)	2012	1001(P)
kederai_505c2	MZUM(P)	2013	241(P)
kederai_505f1	MZUM(P)	2013	243(P)
kederai_5136/5133	MZUM(P)	2013	37(P)
kederai_517a1	MZUM(P)	2013	40(P)
kederai_517g6	MZUM(P)	2013	43(P)
kederai_520b3	MZUM(P)	2013	44(P)
kederai_520b5	MZUM(P)	2013	45(P)
kederai_520c13	MZUM(P)	2013	46(P)
kederai_520d6	MZUM(P)	2013	47(P)
kederai_520e10	MZUM(P)	2013	49(P)
kederai_520e8	MZUM(P)	2013	48(P)
kederai_520f12	MZUM(P)	2013	50(P)
kederai_532c4	MZUM(P)	2013	51(P)
kederai_533c4	MZUM(P)	2013	52(P)
kederai_534a3	NHMUK 2013.8.16.6
kederai_534a4	NHMUK 2013.8.16.5
kederai_534b2	MZUM(P)	2013	480(P)
kederai_534b4	MZUM(P)	2013	481(P)
kederai_534b5	MZUM(P)	2013	482(P)
kederai_534c2	MZUM(P)	2013	55(P)
kederai_534c3	MZUM(P)	2013	56(P)
kederai_534c4	MZUM(P)	2013	57(P)
kederai_534c6	MZUM(P)	2013	58(P)
kederai_534c9	MZUM(P)	2013	59(P)
kederai_58d1	MZUM(P)	2014	136(V)
kederai_58f2	MZUM(P)	2014	137(V)
kederai_58h1	MZUM(P)	2014	138(V)
kederai_58i1	MZUM(P)	2014	139(V)
kederai_58i4				Lost after conversion from temporary to permanent mount
kederai_58i5	MZUM(P)	2014	140(V)
kederai_58j1				Lost after conversion from temporary to permanent mount
kederai_58j2	MZUM(P)	2014	141(P)
kederai_58j6	MZUM(P)	2014	142(P)
kederai_58p1	MZUM(P)	2014	147(V)
kederai_58p4b	MZUM(P)	2014	148(V)
kederai_58p5	MZUM(P)	2014	149(V)
kederai_58q6	MZUM(P)	2014	150(V)
kederai_58r2	MZUM(P)	2014	151(V)
kederai_58u1	MZUM(P)	2014	154(V)
liewi_58a1	NHMUK 2014..11.10.5
liewi_58a3	NHMUK 2014..11.10.6
liewi_58a4	NHMUK 2014..11.10.7
liewi_58b2	NHMUK 2014.11.10.4
liewi_58b4	NHMUK 2014..11.10.8
liewi_58c5	MZUM(P)	2014	9(P)
liewi_58c6	MZUM(P)	2014	10(P)
liewi_58d2	MZUM(P)	2014	11(P)
liewi_58d3	MZUM(P)	2014	12(P)
liewi_58d5	MZUM(P)	2014	13(P)
liewi_58e2	ZRC.PAR.		43
liewi_58e4	ZRC.PAR.		44
liewi_58f1	MZUM(P)	2014	14(P)
liewi_58f3	MZUM(P)	2014	15(P)
liewi_58f5	MZUM(P)	2014	16(P)
liewi_58g1	MZUM(P)	2014	18(P)
liewi_58g4	MZUM(P)	2014	19(P)
liewi_58k4	MZUM(P)	2014	22(P)
liewi_58l1	MZUM(P)	2014	24(P)
liewi_58l3	MZUM(P)	2014	25(P)
liewi_58l4	MZUM(P)	2014	26(P)
liewi_58o1	MZUM(P)	2014	27(P)
liewi_58o2	MZUM(P)	2014	28(P)
liewi_58p3	MZUM(P)	2014	29(P)
liewi_58p6	MZUM(P)	2014	30(P)
liewi_58p7	MZUM(P)	2014	31(P)
liewi_58q11	MZUM(P)	2014	34(P)
liewi_58q8	MZUM(P)	2014	32(P)
liewi_58q9	MZUM(P)	2014	33(P)
liewi_58s1	MZUM(P)	2014	35(P)
liewi_58s5	MZUM(P)	2014	36(P)
liewi_58u4	MZUM(P)	2014	37(P)
nav_131a4	MZUM(P)	2012	670(P)
nav_131a5	MZUM(P)	2012	671(P)
nav_131b1	MZUM(P)	2012	672(P)
nav_131b3	MZUM(P)	2012	673(P)
nav_131b4	MZUM(P)	2012	674(P)
nav_131b6	MZUM(P)	2012	675(P)
nav_131f1	MZUM(P)	2012	688(P)
nav_131f2	MZUM(P)	2012	689(P)
nav_131f4	MZUM(P)	2012	690(P)
nav_131f6	MZUM(P)	2012	691(P)
nav_131f7	MZUM(P)	2012	692(P)
nav_131g1	MZUM(P)	2012	693(P)
nav_474b1	MZUM(P)	2012	645(P)
nav_474b2	MZUM(P)	2012	646(P)
nav_474b3	MZUM(P)	2012	647(P)
nav_474b4	MZUM(P)	2012	648(P)
nav_474b5	MZUM(P)	2012	649(P)
nav_474b6	MZUM(P)	2012	650(P)
nav_474d9	MZUM(P)	2012	654(P)
nav_512a2	MZUM(P)	2013	279(V)
nav_512a5	MZUM(P)	2013	280(V)
nav_512a7	MZUM(P)	2013	261(V)
nav_512b3	MZUM(P)	2013	281(V)
nav_512b5	MZUM(P)	2013	282(V)
nav_512d1	MZUM(P)	2013	283(V)
nav_512d7	MZUM(P)	2013	284(V)
nav_512e2	MZUM(P)	2013	285(V)
nav_512e3	MZUM(P)	2013	286(V)
nav_512e4	MZUM(P)	2013	287(V)
nav_512e6	MZUM(P)	2013	288(V)
nav_512f2	MZUM(P)	2013	289(V)
nav_512f5	MZUM(P)	2013	290(V)
nav_526a2	MZUM(P)	2013	54(V)
nav_526a4	MZUM(P)	2013	314(V)
nav_526a5	MZUM(P)	2013	315(V)
nav_526a6	MZUM(P)	2013	316(V)
nav_526b2	MZUM(P)	2015	3(V)
nav_526b3	MZUM(P)	2015	4(V)
nav_526b4	MZUM(P)	2015	5(V)
nav_526b5	MZUM(P)	2015	6(V)
nav_526b6	MZUM(P)	2015	7(V)
nav_526b7	MZUM(P)	2015	8(V)
nav_526c1	MZUM(P)	2015	10(V)
nav_526c10	MZUM(P)	2015	19(V)
nav_526c11	MZUM(P)	2015	20(V)
nav_526c2	MZUM(P)	2015	11(V)
nav_526c3	MZUM(P)	2015	12(V)
nav_526c5	MZUM(P)	2015	14(V)
nav_526c7	MZUM(P)	2015	16(V)
nav_526c8	MZUM(P)	2015	17(V)
par_130a6	MZUM(P)	2012	144(P)
par_130b1	MZUM(P)	2012	145(P)
par_130b4	MZUM(P)	2012	147(P)
par_130b6	MZUM(P)	2012	149(P)
par_130f1	MZUM(P)	2012	158(P)
par_130f5	MZUM(P)	2012	159(P)
par_131a1	MZUM(P)	2012	173(P)
par_216a1	MZUM(P)	2012	64(P)
par_217a3	MZUM(P)	2012	78(P)
par_217b2	MZUM(P)	2012	81(P)
par_386a5	MZUM(P)	2012	37(P)
par_386c3	MZUM(P)	2012	41(P)
par_386d5	MZUM(P)	2012	43(P)
par_386e6	MZUM(P)	2012	46(P)
par_386f5	MZUM(P)	2012	47(P)
par_387a8	MZUM(P)	2012	33(P)
par_387e2	MZUM(P)	2012	34(P)
par_387e4	MZUM(P)	2012	35(P)
par_387e5	MZUM(P)	2012	36(P)
par_439b3	MZUM(P)	2012	67(P)
par_439c1	MZUM(P)	2012	69(P)
par_443b1	MZUM(P)	2012	83(P)
par_443b2	MZUM(P)	2012	84(P)
par_443b4	MZUM(P)	2012	85(P)
par_443b7	MZUM(P)	2012	87(P)
par_443b8	MZUM(P)	2012	88(P)
par_443c5	MZUM(P)	2012	90(P)
par_446a1	MZUM(P)	2012	50(P)
par_446a4	MZUM(P)	2012	51(P)
par_446c6	MZUM(P)	2012	54(P)
par_446d2	MZUM(P)	2012	55(P)
par_446d5	MZUM(P)	2012	56(P)
par_446d7	MZUM(P)	2012	57(P)
par_446e	MZUM(P)	2012	58(P)
par_460a1	MZUM(P)	2012	59(P)
par_460a3	MZUM(P)	2012	60(P)
par_474a2	MZUM(P)	2012	124(P)
par_474c2	MZUM(P)	2012	125(P)
par_474d1	MZUM(P)	2012	126(P)
par_474d6	MZUM(P)	2012	128(P)
par_512b2	MZUM(P)	2013	245(V)
par_512b4	MZUM(P)	2013	246(V)
par_512c2	MZUM(P)	2013	247(V)
par_512d3	MZUM(P)	2013	249(V)
par_526c4	MZUM(P)	2015	13(V)
par_526f3	MZUM(P)	2015	36(V)
par_526f4	MZUM(P)	2015	37(V)
par_542b1	MZUM(P)	2013	250(V)
par_542b2	MZUM(P)	2013	251(V)
