# Supplementary material for: Monogenean anchor morphometry: systematic value, phylogenetic signal, and evolution
Source: PeerJ. 2016 Feb 4;4:e1668. doi: 10.7717/peerj.1668 (PMC4783769; doi:10.7717/peerj.1668)
Supplement: Table S6 — Accuracy of hierarchical clustering prediction result using filtered shape data (n = 437). [file peerj-04-1668-s032.xlsx]

## Sheet: heatmapclus
	bantingensis	belanaki	careyensis	chelatus	fenestrum	funnelus	grandis	johorensis	kedahensis	kederai	liewi	navjotsodhii	parvicopulatrix
bantingensis	17	0	0	0	0	0	0	0	0	0	0	0	0
belanaki	0	42	0	1	0	0	0	0	0	0	0	0	0
careyensis	0	7	0	0	0	1	0	0	0	0	0	0	0
chelatus	0	0	0	41	0	0	0	0	0	0	0	0	0
fenestrum	0	0	0	0	25	0	0	0	0	0	0	0	0
funnelus	0	0	0	0	0	47	0	0	0	0	0	0	0
grandis	0	0	0	0	0	0	15	0	0	0	0	0	0
johorensis	0	0	0	0	0	0	0	49	0	0	0	0	0
kedahensis	0	0	0	0	0	0	0	0	38	0	0	0	0
kederai	0	0	0	0	0	0	0	0	0	35	0	0	0
liewi	0	0	0	0	0	0	0	0	0	0	31	0	0
navjotsodhii	0	0	0	2	0	0	0	0	0	0	0	43	0
parvicopulatrix	0	0	0	0	0	0	0	0	0	0	0	0	43
	misclassfied
	correctly classified
row: species label based on taxonomist's assessment
column: species label based on hierarchical clustering
