# Supplementary material for: Monogenean anchor morphometry: systematic value, phylogenetic signal, and evolution
Source: PeerJ. 2016 Feb 4;4:e1668. doi: 10.7717/peerj.1668 (PMC4783769; doi:10.7717/peerj.1668)
Supplement: Table S7 — Accuracy of hierarchical clustering prediction result using unfiltered shape data (n = 530). [file peerj-04-1668-s033.xlsx]

## Sheet: heatmapclus_nofilter
	bantingensis	belanaki	careyensis	chelatus	fenestrum	funnelus	grandis	johorensis	kedahensis	kederai	liewi	navjotsodhii	parvicopulatrix
bantingensis	31	0	0	0	0	0	0	0	0	0	0	0	0
belanaki	0	46	0	0	0	0	0	0	0	0	0	2	0
careyensis	0	8	0	0	0	1	0	0	0	0	0	1	0
chelatus	0	0	0	44	0	0	0	0	0	0	0	5	0
fenestrum	0	0	0	0	50	0	0	0	0	0	0	0	0
funnelus	0	1	0	0	0	48	0	0	0	0	0	0	0
grandis	0	0	0	0	0	0	22	0	0	0	0	0	0
johorensis	0	0	0	0	0	0	0	50	0	0	0	0	0
kedahensis	0	0	0	0	0	0	0	1	49	0	0	0	0
kederai	0	0	0	0	0	0	0	0	0	41	0	0	0
liewi	0	0	0	0	0	0	0	0	0	0	32	0	0
navjotsodhii	0	0	0	0	0	0	0	0	0	0	0	50	0
parvicopulatrix	0	0	0	0	0	1	0	0	0	0	0	0	48
	misclassfied
	correctly classified
row: species label based on taxonomist's assessment
column: species label based on hierarchical clustering
